# Supplementary material for: Phytochemical Profile and Biological Activity of Endemic Sideritis sipylea Boiss. in North Aegean Greek Islands
Source: PubMed Central journal article supplement (PMC7248978; doi:10.3390/molecules25092022), 2020-04-26
Supplement: molecules-25-02022-s001.pdf [file molecules-25-02022-s001.pdf]

## Supplementary Material

# Phytochemical Profile and Biological Activity of Endemic *Sideritis sipylea* Boiss. in North Aegean Greek Islands

Evangelos Axiotis, Eleftherios A. Petrakis, Maria Halabalaki and Sofia Mitakou \*

Department of Pharmacognosy and Natural Products Chemistry, Faculty of Pharmacy, National and Kapodistrian University of Athens, Panepistimiopolis Zografou, 15771 Athens, Greece; axiotisevan@pharm.uoa.gr (E.A.); epetrakis@pharm.uoa.gr (E.A.P.); mariahal@pharm.uoa.gr (M.H.)

\* Correspondence: mitakou@pharm.uoa.gr; Tel.: +30-210-727-4594

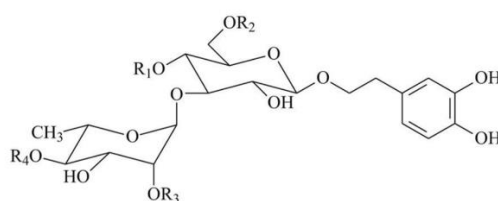

| Compound                | R <sub>1</sub> | R <sub>2</sub> | R <sub>3</sub> | R <sub>4</sub> |
|-------------------------|----------------|----------------|----------------|----------------|
| <b>echinacoside</b>     | feru.          | glc            | H              | H              |
| <b>forsythoside B</b>   | caff.          | api.           | H              | H              |
| <b>verbascoside</b>     | caff.          | H              | H              | H              |
| <b>samioside</b>        | caff.          | H              | H              | api.           |
| <b>isoverbascoside</b>  | H              | caff.          | H              | H              |
| <b>allysonoside</b>     | feru.          | api.           | H              | H              |
| <b>leucoseptoside A</b> | feru.          | H              | H              | H              |

**Figure S1.** Identified phenylethanoid glycosides in *S. sipylea* (feru-feruoyl, caff-caffeyl, glc-glucose, api-apiose).

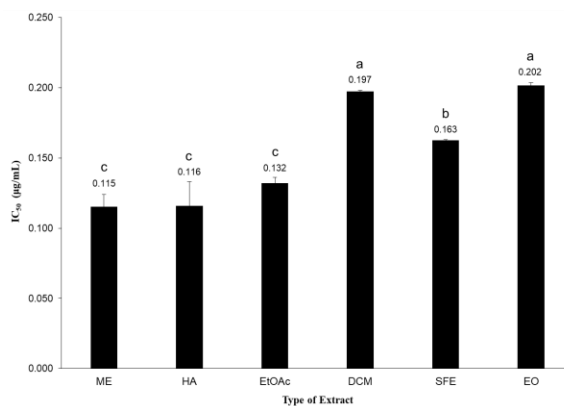

**Figure S2.** IC<sub>50</sub> values of crude methanol (ME), water/methanol (HA), ethyl acetate (EtOAc), dichloromethane (DCM), and supercritical fluid (SFE) extracts, along with essential oil (EO) obtained from *S. sipylea* aerial parts (mean ± SD). Significant differences among the IC<sub>50</sub> values of extracts are indicated by different letters ( $p < 0.05$ ).

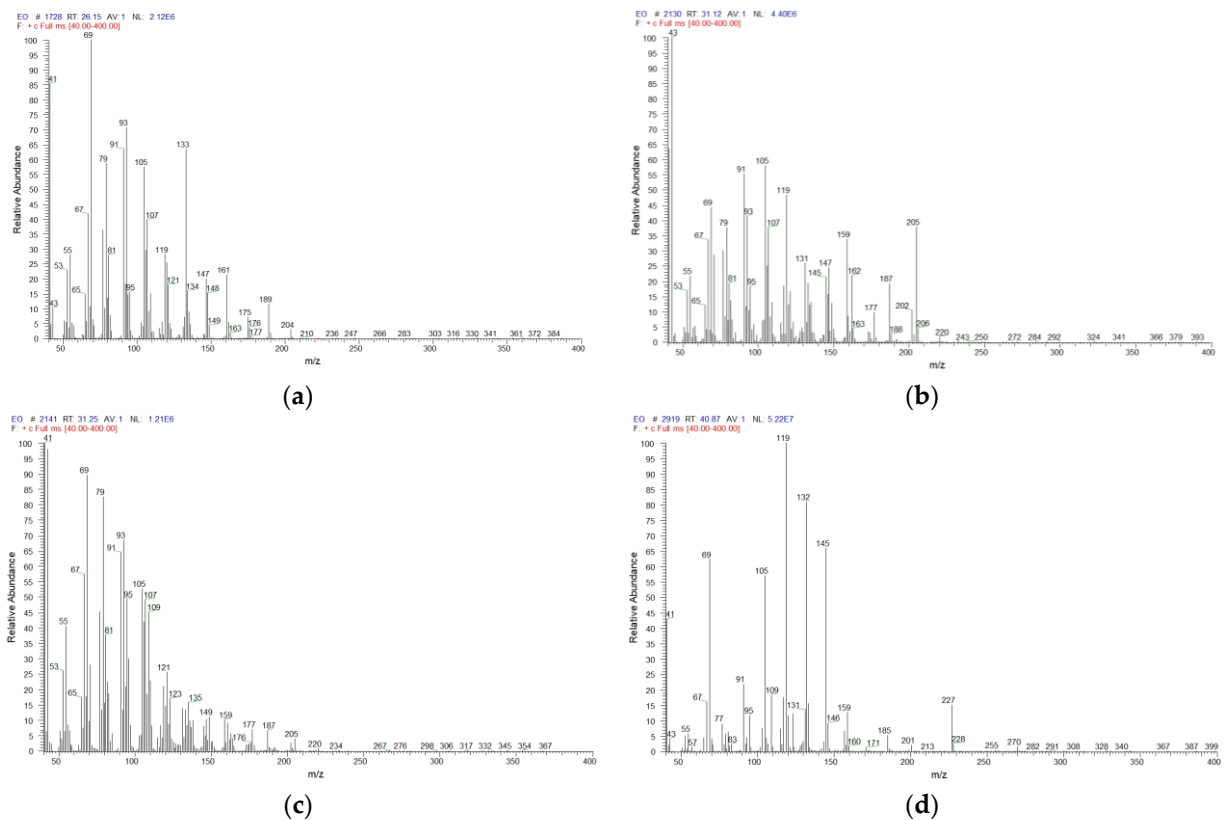

**Figure S3.** Fragment ions and relative abundance ( $m/z$ , %) of some characteristic volatile compounds identified in *S. sipylea* non-polar extracts. **(a)**  $\beta$ -Caryophyllene (% score of similarity: 35.05). tR: 26.1 min, EI-MS  $m/z$  (%): 41 (85), 53 (23), 55 (28), 67 (42), 69 (100), 77 (36), 79 (59), 81 (28), 91 (63), 93 (71), 105 (58), 106 (29), 107 (40), 119 (28), 120 (25), 133 (64), 147 (20), 161 (21), 204 ( $M^+$ , 3). **(b)** Spathulenol (% score of similarity: 48.44). tR: 31.1 min, EI-MS  $m/z$  (%): 41 (64), 43 (100), 55 (22), 67 (33), 69 (44), 71 (29), 77 (30), 79 (38), 91 (55), 93 (41), 105 (58), 106 (25), 107 (38), 119 (48), 131 (26), 145 (21), 147 (24), 159 (34), 162 (22), 205 (38), 220 ( $M^+$ , 2). **(c)** Caryophyllene oxide (% score of similarity: 35.01). tR: 31.2 min, EI-MS  $m/z$  (%): 41 (100), 43 (98), 53 (26), 55 (40), 67 (57), 69 (90), 71 (28), 77 (45), 79 (82), 81 (38), 91 (65), 93 (68), 95 (49), 96 (30), 105 (53), 106 (42), 107 (49), 109 (45), 110 (23), 121 (26), 220 ( $M^+$ , 1). **(d)** Geranyl-*p*-cymene (% score of similarity: 92.68). tR: 40.9 min, EI-MS  $m/z$  (%): 41 (43), 67 (16), 69 (62), 91 (22), 95 (12), 105 (57), 109 (18), 117 (18), 119 (100), 120 (12), 123 (12), 131 (13), 132 (81), 133 (16), 145 (66), 159 (13), 227 ( $[M-CH_3]^+$ , 15).
